# Supplementary material for: Intermolecular interactions between a Ru complex and organic dyes in cosensitized solar cells: a computational study
Source: Royal Society of Chemistry journal article supplement (doi:10.1039/c4cp01880j), 2014-06-17
Supplement: c4cp01880j1.pdf [file c4cp01880j1.pdf]

## Electronic Supplementary Information (ESI)

# **Intermolecular Interactions between a Ru Complex and Organic Dyes in Cosensitized Solar Cells: A Computational Study**

Hitoshi Kusama,\* Takashi Funaki, Nagatoshi Koumura and Kazuhiro Sayama

*National Institute of Advanced Industrial Science and Technology (AIST), AIST Tsukuba Central  
5, 1-1-1 Higashi, Tsukuba, Ibaraki 305-8565, Japan*

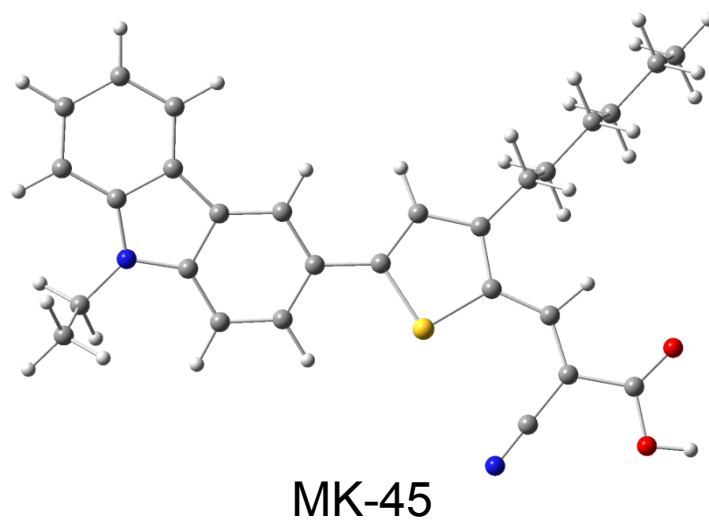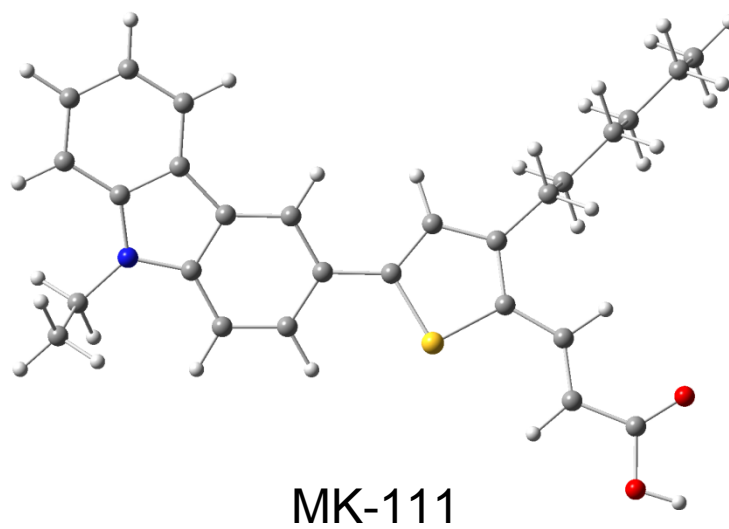

**Fig. S1** Optimized geometries of the MK-45 and MK-111 monomers. White, grey, blue, red, and yellow indicate H, C, N, O, and S atoms, respectively.

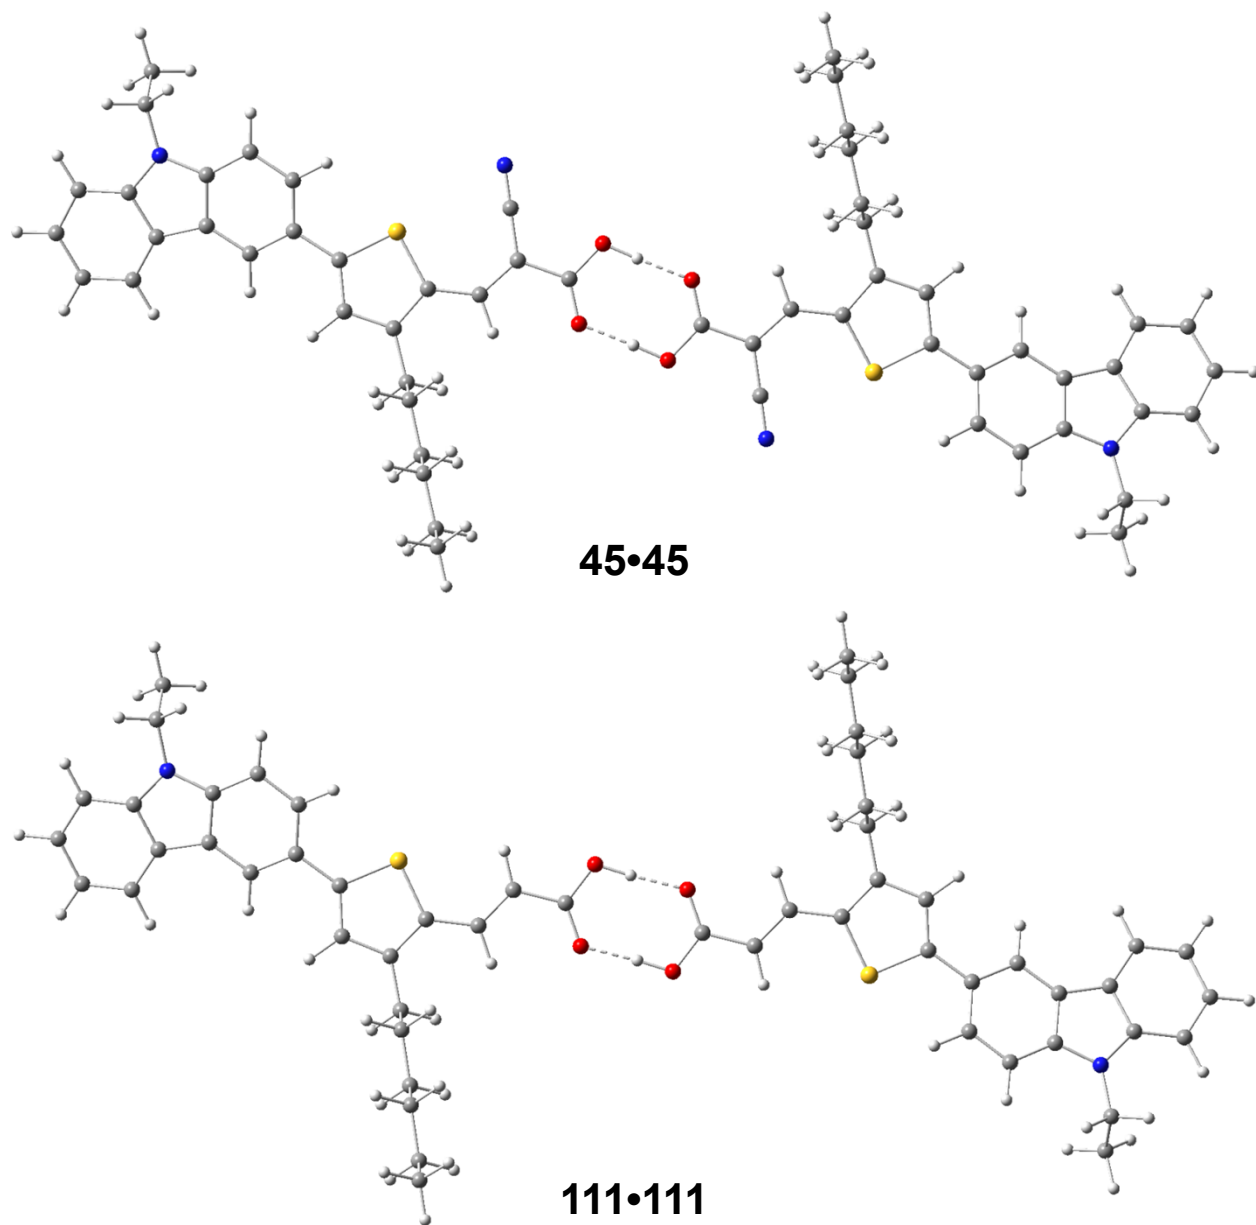

**Fig. S2** Optimized geometries of the MK dimers. White, grey, blue, red, and yellow indicate H, C, N, O, and S atoms, respectively.

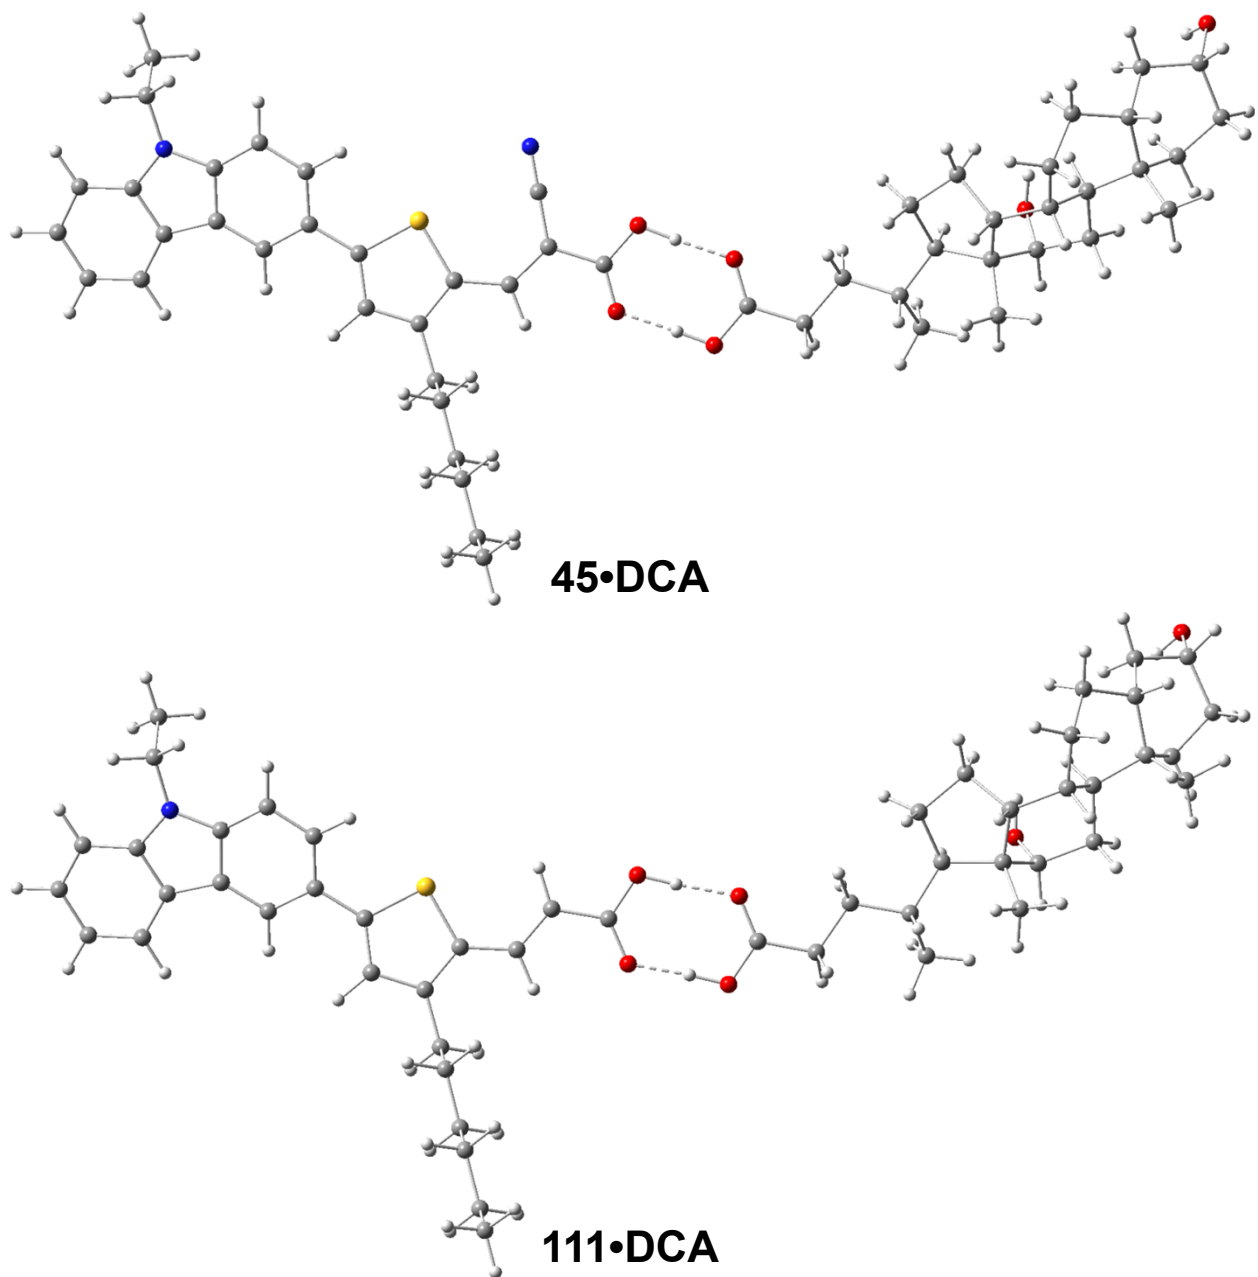

**Fig. S3** Optimized geometries of the MK-45–DCA and MK-111–DCA species. White, grey, blue, red, and yellow indicate H, C, N, O, and S atoms, respectively.

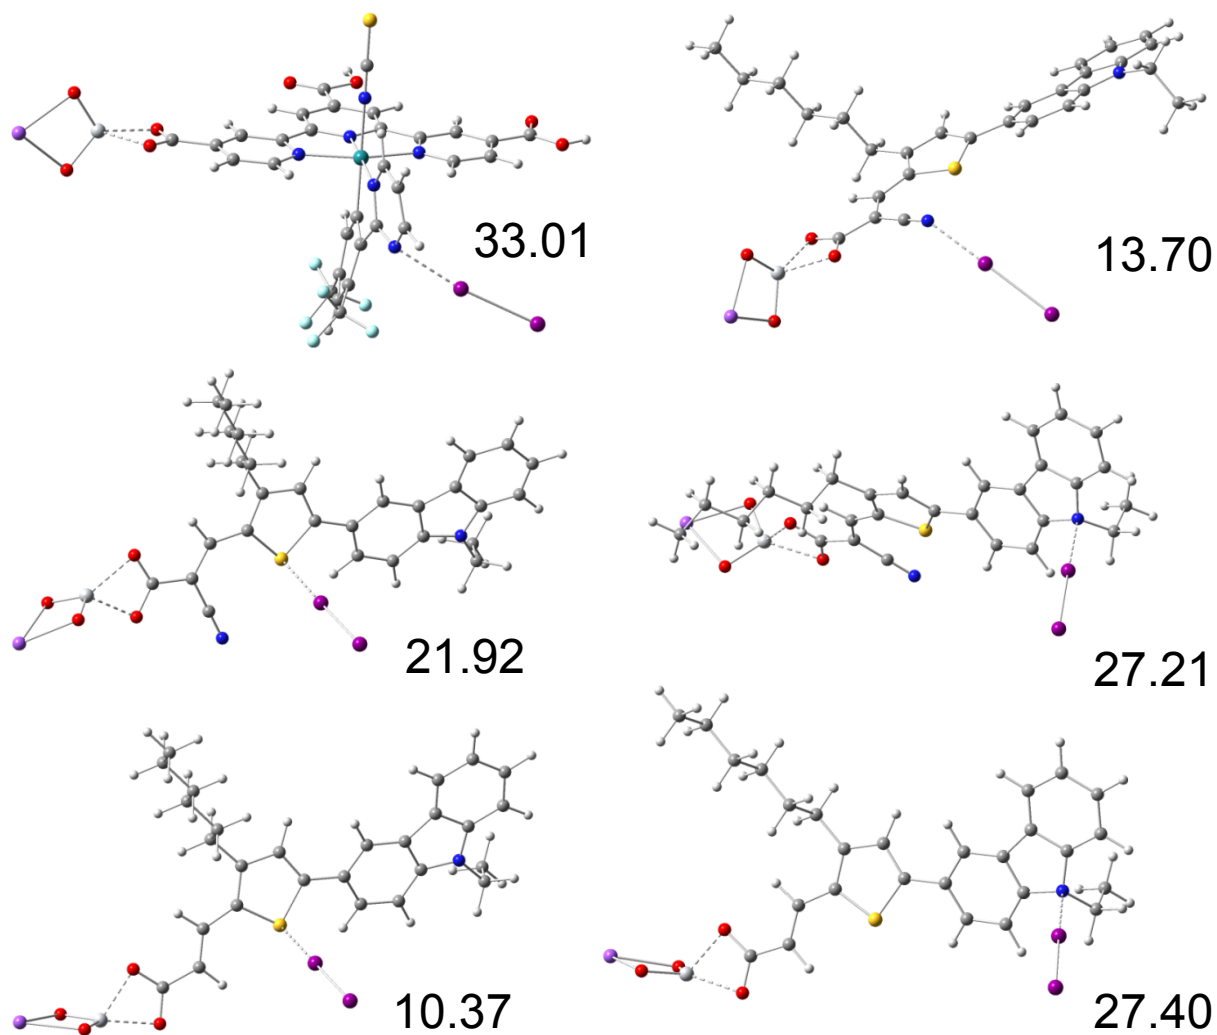

**Fig. S4** Optimized geometries of the dye(TiO<sub>2</sub>Na)-I<sub>2</sub> species with positive  $\Delta G$  values. White, grey, blue, red, aqua, purple, yellow, ash, teal, and violet indicate H, C, N, O, F, Na, S, Ti, Ru, and I atoms, respectively.  $\Delta G$  values are given in kJ mol<sup>-1</sup>.

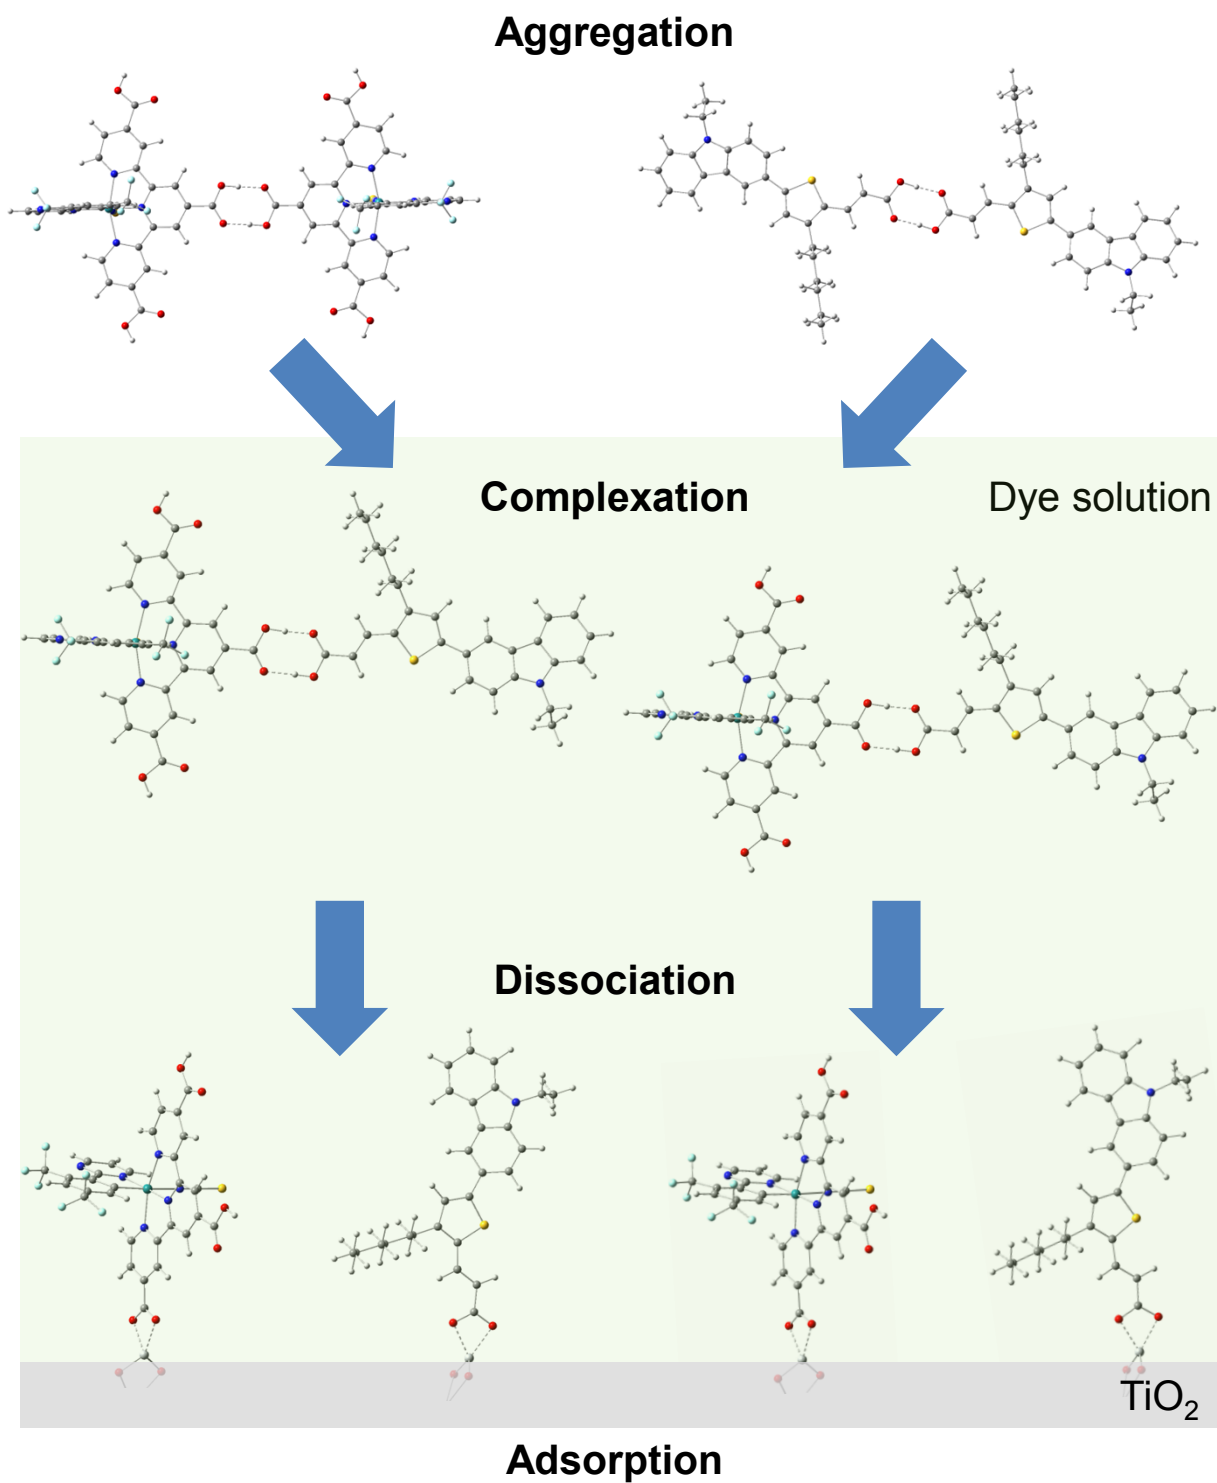

**Fig. S5** Proposed suppression mechanism for FT89 aggregation by MK-111 during the immersion process of a  $\text{TiO}_2$  film.

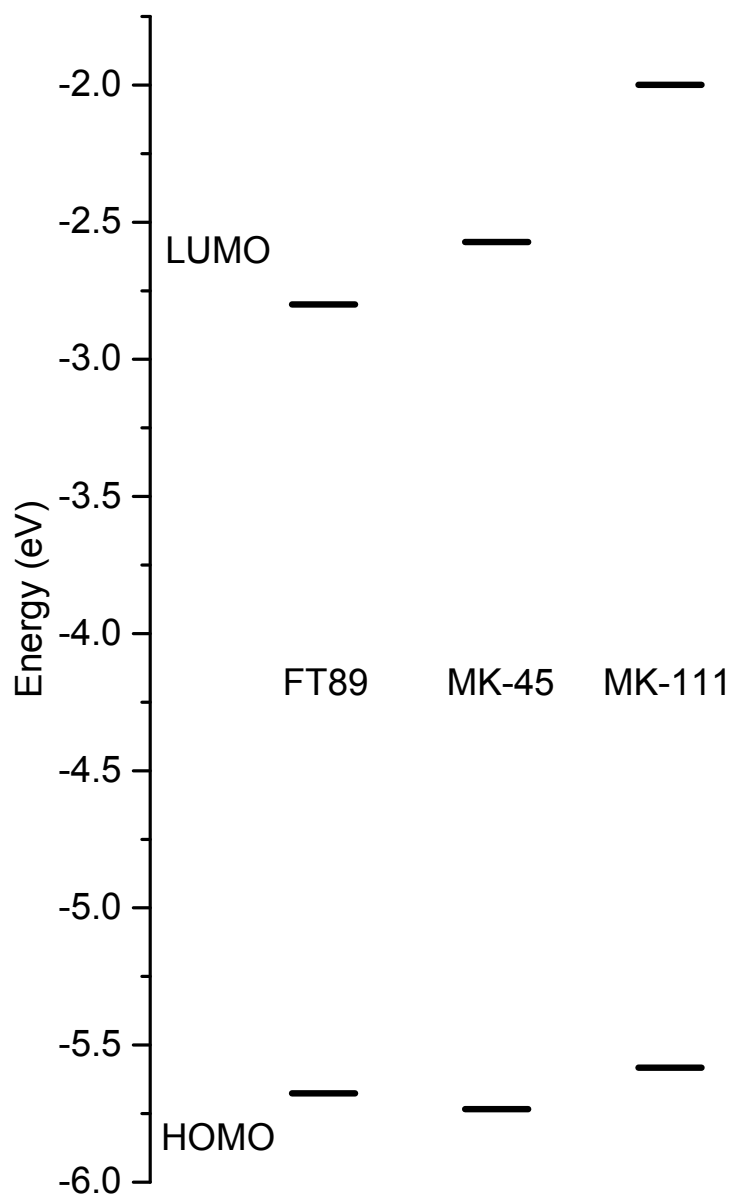

**Fig. S6** Energy level diagrams of the dyes.

**Table S1** Selected bond distances (Å) and dihedral angles (deg) for MK-45 and MK-111

|        | C–T distance | T–A distance | C–T dihedral | T–A dihedral |
|--------|--------------|--------------|--------------|--------------|
| MK-45  | 1.456        | 1.411        | 160.0        | –178.0       |
| MK-111 | 1.460        | 1.430        | 156.9        | –177.4       |



**Table S2** Photovoltaic performances of DSSCs under 100 mW cm<sup>-2</sup> of AM1.5G filtered light<sup>S1</sup>

| Entry | Dye             | $J_{sc}^a$ (mA cm <sup>-2</sup> ) | $V_{oc}^b$ (V) | $ff^c$ | $\eta^d$ (%) | $I^e$ of FT89 (10 <sup>-7</sup> mol cm <sup>-2</sup> ) | $I^e$ of MK dye (10 <sup>-7</sup> mol cm <sup>-2</sup> ) |
|-------|-----------------|-----------------------------------|----------------|--------|--------------|--------------------------------------------------------|----------------------------------------------------------|
| 1     | FT89            | 19.2                              | 0.67           | 0.71   | 9.1          | 2.3                                                    |                                                          |
| 2     | MK-45           | 10.4                              | 0.73           | 0.73   | 5.5          |                                                        | 4.5                                                      |
| 3     | MK-111          | 6.8                               | 0.68           | 0.72   | 3.4          |                                                        | 4.3                                                      |
| 4     | FT89+MK-45      | 19.9                              | 0.69           | 0.68   | 9.4          | 1.2                                                    | 1.8                                                      |
| 5     | FT89+MK-111     | 21.0                              | 0.71           | 0.66   | 9.8          | 1.0                                                    | 2.0                                                      |
| 6     | FT89+DCA        | 20.5                              | 0.70           | 0.67   | 9.6          | 1.6                                                    |                                                          |
| 7     | FT89+MK-45+DCA  | 20.7                              | 0.70           | 0.69   | 10.0         | 1.4                                                    | 1.3                                                      |
| 8     | FT89+MK-111+DCA | 21.2                              | 0.71           | 0.68   | 10.2         | 1.1                                                    | 1.3                                                      |

<sup>a</sup> Short-circuit photocurrent density. <sup>b</sup> Open-circuit photovoltage. <sup>c</sup> Fill factor. <sup>d</sup> Solar energy conversion efficiency. <sup>e</sup> Amount of sensitizer.

## Notes and references

S1 T. Funaki, N. Koumura and K. Sayama, *Chem. Lett.*, 2013, **42**, 1371–1373.
